# Supplementary material
Source: PubMed Central journal article supplement (PMC8263667)
Supplement: ajcr0011-2944-f7.pdf [file ajcr0011-2944-f7.pdf]

# Niclosamide for prostate cancer

**Table S1.** Sequence of siRNA and primer for experiments

| Sequence of siRNA           |                                           |                                           |
|-----------------------------|-------------------------------------------|-------------------------------------------|
| Name                        | Sequence (5' to 3')                       |                                           |
| siFOX1-1                    | CAACAGGAGUCUAAUCAAG                       |                                           |
| siFOX1-2                    | GGACCACUUUCCCUACUUU                       |                                           |
| siFOX1-3                    | CUCUUCUCCUCAGAUUA                         |                                           |
| siEXO1                      | GCACGUAAUUAAGUGAUG                        |                                           |
| Primer for RT-qPCR          |                                           |                                           |
| Gene                        | Forward sequence (5' to 3')               | Reverse sequence (5' to 3')               |
| FOX1                        | TTCAGAACCCTTAGACCTCATC                    | GCTGAGGCTGTCATTATTGTG                     |
| BARD1                       | TCTGTAGCCAACCATCTGTATCTC                  | ACTTCATTCTGCTCTTAGTGTCTG                  |
| EXO1                        | CCTGCCATTCAAGAAGTCATAG                    | TAATCACTCGTTCCACTCCCAC                    |
| BLM                         | CAGACTCCGAAGGAAGTTGTATG                   | GAAGTCTCAGAAGTATCAAAGTCATCC               |
| BRCA2                       | CTTGCCCTTTTCGTCTATTTG                     | GTCGCCACTGGAGGTTGC                        |
| RAD51                       | TTGTAGACAGTGCCACCGCC                      | AACATCGTGTCCATCCAC                        |
| $\beta$ -actin              | GAGACCTTCAACACCCAGC                       | ATGAGGTAGTCAGTCAGGTCCC                    |
| Primer for ChIP assay       |                                           |                                           |
| Name                        | Forward sequence (5' to 3')               | Reverse sequence (5' to 3')               |
| EXO1 P1                     | GCTAAATCTGGCAACCCTACC                     | AGGCATAAAGAGATGTCCTGTGTC                  |
| EXO1 P2                     | AGGTAAATGGTAGGGGCAGAT                     | CTCGGAAGTTGGGAGTGTTC                      |
| Primer for promoter cloning |                                           |                                           |
| Name                        | Forward sequence (5' to 3')               | Reverse sequence (5' to 3')               |
| pGL3-EXO1 P1                | TAAGTGGCCGTACCTACCTCAAAGGTTTTCAAGTCTATTGA | CGGATTGCCAAGCTTCAAAGGTTTCAAAGTCTATTCTTGG  |
| pGL3-EXO1 P2                | TAAGTGGCCGTACCTACTACTGCAATGGGGAAAAGAACC   | CGGATTGCCAAGCTTAACACGGGTAAGTTCCTACACAGCGC |
| pGL3-BLM P                  | TAAGTGGCCGTACCAAGGAATTGTCAGTCTTTTCATTC    | CGGATTGCCAAGCTTAAATCTGCCTGTACACAGTAAGTCC  |

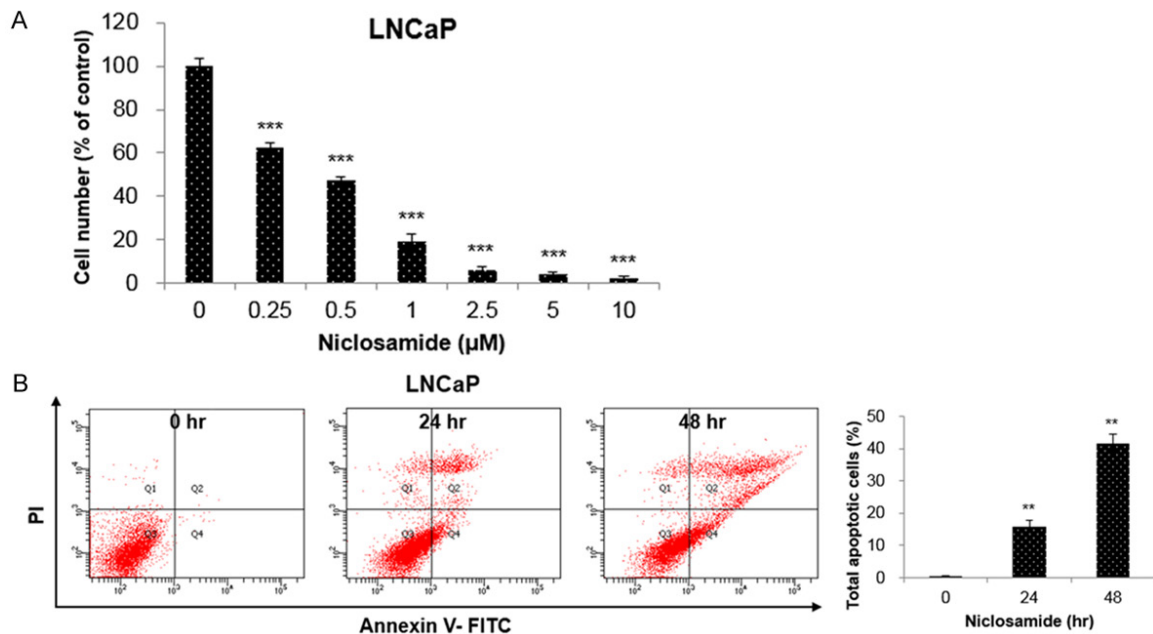

**Figure S1.** Niclosamide inhibits cell proliferation and induces apoptosis in LNCaP cells. (A) LNCaP cells were incubated with the indicated concentrations of niclosamide for 48 hr and cell viability was measured using the WST assay. (B) LNCaP cells were incubated with 0.5  $\mu\text{M}$  niclosamide for 24 and 48 hr. Apoptosis was determined by analyzing FITC Annexin V-PI staining. All data are presented as the mean  $\pm$  SD of two experiments performed in triplicate. \*\* $P < 0.01$ , \*\*\* $P < 0.001$ , two-tailed Student's  $t$  test.

# Niclosamide for prostate cancer

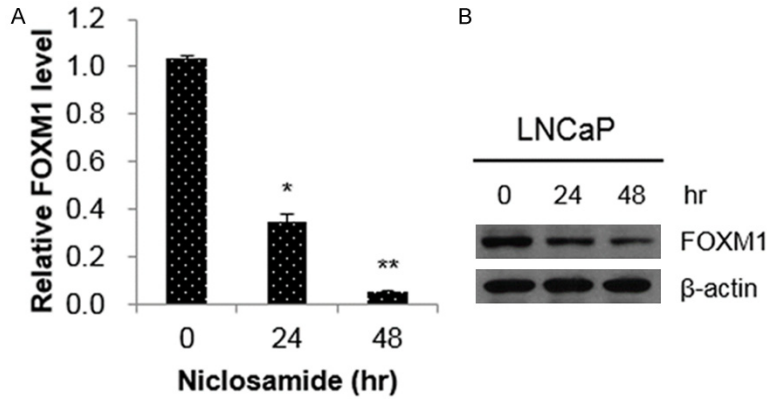

**Figure S2.** Niclosamide reduces the expression of FOXM1 in LNCaP cells. (A and B) LNCaP cells were incubated with 0.5  $\mu$ M niclosamide for 24 or 48 hr. FOXM1 mRNA (A) and protein (B) expression was determined using qRT-PCR and western blot analyses, respectively.  $\beta$ -actin was used as an internal control. Data are presented as the mean  $\pm$  SD of two experiments performed in triplicate. \* $P < 0.05$ , \*\* $P < 0.01$ , two-tailed Student's  $t$  test.

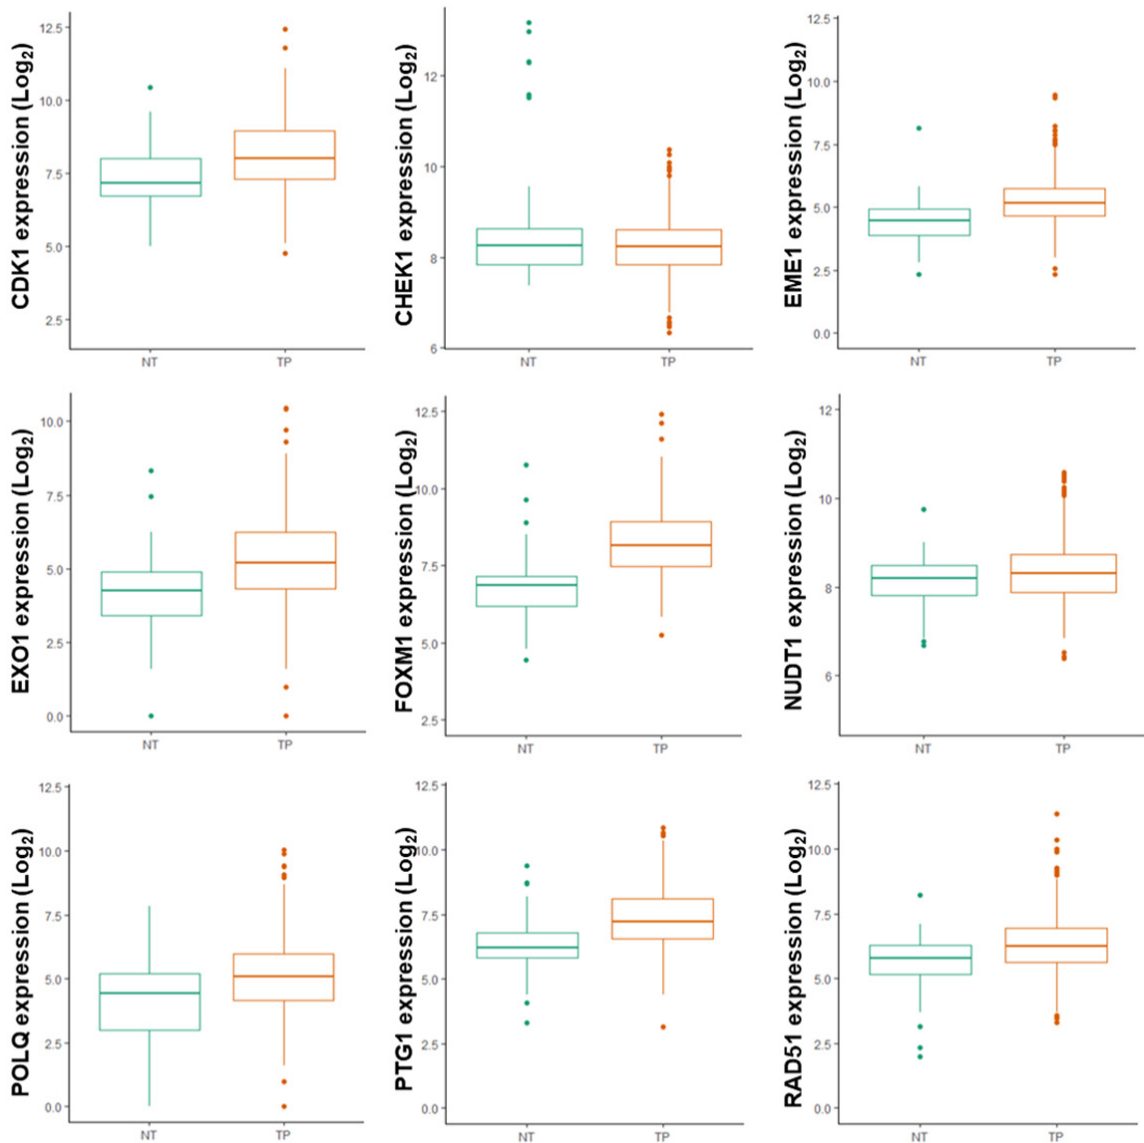

## Niclosamide for prostate cancer

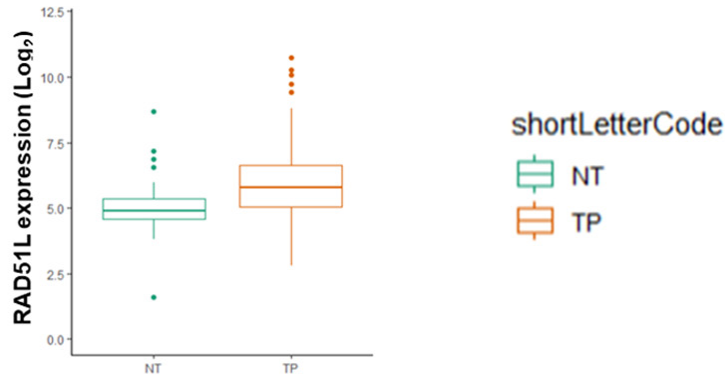

**Figure S3.** Analysis of mRNA expression for 10 clinically important genes in tumor and adjacent normal tissues using the TCGA data set.

**Table S2.** Clinical significance of the 10 candidate target genes

| Gene<br>Symbol | FC<br>(PC3-Niclosamide/PC3-DMSO) | Log2 FC<br>(Tumor/Normal, GDC portal, TCGA-PRAD) | Overall survival <i>p</i> value<br>(TCGA, Firehose Legacy) |
|----------------|----------------------------------|--------------------------------------------------|------------------------------------------------------------|
| CDK1           | 0.078                            | 1.123259                                         | 0.0276                                                     |
| EXO1           | 0.168                            | 1.405179                                         | <0.0001                                                    |
| RAD54L         | 0.200                            | 1.281174                                         | 0.38                                                       |
| PTTG1          | 0.218                            | 1.356720                                         | 0.357                                                      |
| RAD51          | 0.270                            | 1.140352                                         | 0.179                                                      |
| NUDT1          | 0.271                            | -1.16502                                         | 0.791                                                      |
| POLQ           | 0.281                            | 1.252423                                         | 0.646                                                      |
| FOXM1          | 0.322                            | 1.627793                                         | 0.0113                                                     |
| CHEK1          | 0.381                            | -1.25142                                         | 0.678                                                      |
| EME1           | 0.394                            | 1.048552                                         | 0.12                                                       |

## Niclosamide for prostate cancer

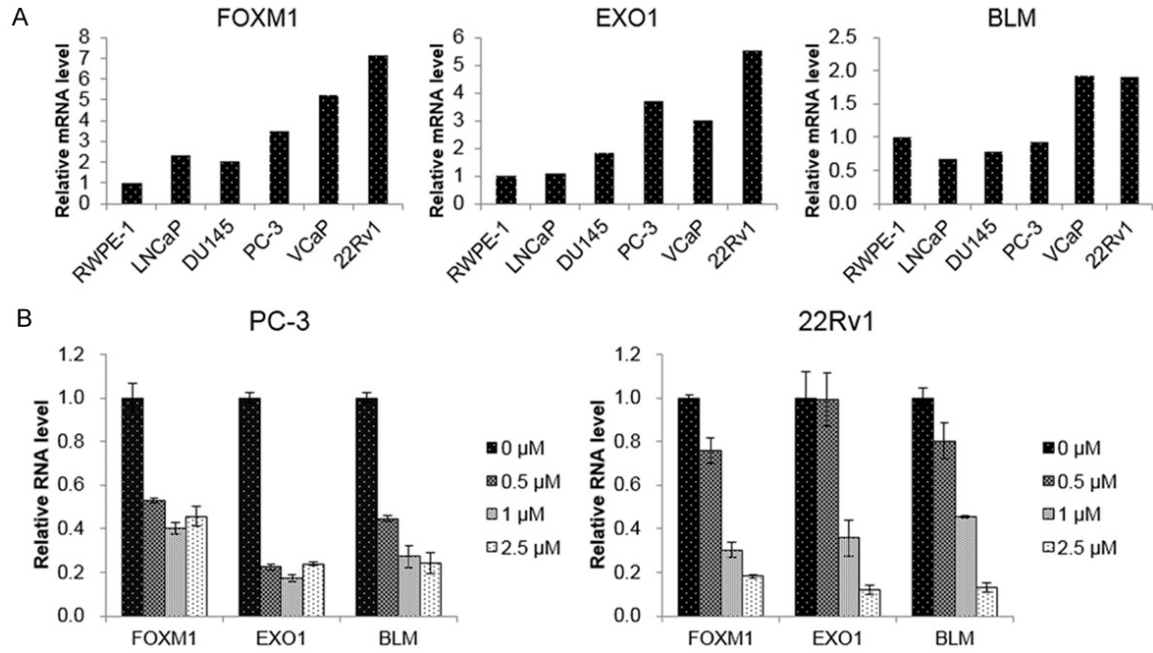

**Figure S4.** FOXM1, EXO1, and BLM mRNA expression in the different cell lines. (A) qRT-PCR was used to evaluate the basal expression of FOXM1, EXO1, and BLM in the indicated cell lines. The control cell line was the non-tumorigenic human prostate epithelial cell line RWPE-1. (B) PC-3 and 22Rv1 cells were incubated with the indicated concentrations of niclosamide for 48 hr. mRNA expression was quantified by qRT-PCR.  $\beta$ -actin mRNA was used as an internal control to normalize the data.

**Table S3.** Correlation coefficient and overall and disease-free survival from the TCGA database

|        | co-expression with FOXM1 |                        | Overall Survival<br>( <i>p</i> -value) | Disease Free Survival<br>( <i>p</i> -value) |
|--------|--------------------------|------------------------|----------------------------------------|---------------------------------------------|
|        | Pearson's correlation    | Spearman's correlation |                                        |                                             |
| RAD54B | 0.63                     | 0.46                   | 0.126                                  | 0.0831                                      |
| BLM    | 0.72                     | 0.70                   | 0.237                                  | 0.00488                                     |
| RAD51  | 0.49                     | 0.69                   | 0.182                                  | 0.0579                                      |
| SHFM1  | 0.14                     | 0.14                   | 0.199                                  | 0.342                                       |
| BRCA2  | 0.54                     | 0.43                   | 0.086                                  | 0.200                                       |
| XRCC2  | 0.59                     | 0.56                   | 0.482                                  | 0.00123                                     |
| FANCM  | 0.26                     | 0.24                   | 0.0935                                 | 0.535                                       |
| EXO1   | 0.88                     | 0.80                   | 0.0001701                              | 0.0138                                      |
| POLH   | 0.26                     | 0.15                   | 0.00114                                | 0.746                                       |
| EME1   | 0.69                     | 0.61                   | 0.198                                  | 0.164                                       |
| BARD1  | 0.25                     | 0.19                   | 0.502                                  | 0.709                                       |
